# Supplementary material for: Aluminium alkyl complexes supported by [OSSO] type bisphenolato ligands: synthesis, characterization and living polymerization of rac-lactide
Source: Royal Society of Chemistry journal article supplement (doi:10.1039/b416875e), 2005-01-01
Supplement: b416875e.pdf [file b416875e.pdf]

## Supplementary information for

Aluminum alkyl complexes supported by [OSSO] type bisphenolato ligands:  
synthesis, characterization and living polymerization of *rac*-lactide

Haiyan Ma,<sup>a</sup> Gianluca Melillo,<sup>b</sup> Leone Oliva,<sup>b</sup> Thomas P. Spaniol,<sup>a</sup> Ulli Englert<sup>a</sup> and Jun Okuda<sup>a,\*</sup>

<sup>a</sup> Institute of Inorganic Chemistry, Aachen University of Technology (RWTH),

Professor-Pirlet-Straße 1, Aachen 52056, Germany. E-mail: [jun.okuda@ac.rwth-aachen.de](mailto:jun.okuda@ac.rwth-aachen.de)

<sup>b</sup> Dipartimento di Chimica, Università di Salerno, Via S. Allede, I-84081 Baronissi (SA), Italy.

## Results and Discussion about Aluminum Complex **1a**

The isolation of pure complex [(etbmp)AlMe] (**1**) was accompanied by the precipitation of a white powder **1a** (~5% of the theoretical yield) even under extremely strict exclusion of air and moisture. **1a** showed a complicated resonance pattern in the  $^1\text{H}$  NMR spectrum including 6 signals for the 4-methyl group and no Al-methyl resonance. Needle-like single crystals of **1a** were obtained from the mother liquor upon standing at room temperature, which immediately lost transparency when taken out of the solution. From the  $^1\text{H}$  NMR spectrum, we speculated **1a** to be a derivative of “[etbmp]<sub>3</sub>Al<sub>2</sub>”. In order to obtain **1a** on the preparative scale, we attempted the reactions of AlMe<sub>3</sub> or complex **1** with excess etbmpH<sub>2</sub>, but no reaction occurred to produce **1a**. Thus, most likely **1a** was formed by the rearrangement of complex **1** in solution.

$^1\text{H}$  NMR spectroscopic data of **1a**,  $\delta_{\text{H}}$  (200 MHz, CDCl<sub>3</sub>): 7.10 (d, 1H,  $^4J = 2$  Hz, Ar-*H*), 7.01 (d, 1H,  $^4J = 2$  Hz, Ar-*H*), 6.97 (s, 2 H, Ar-*H*), 6.96 (d, 1H, Ar-*H*), 6.94 (s, 2 H, Ar-*H*), 6.91 (d, 1 H,  $^4J = 2$  Hz, Ar-*H*), 6.89 (d, 1 H,  $^4J = 2$  Hz, Ar-*H*), 6.85 (d, 1 H,  $^4J = 2$  Hz, Ar-*H*), 6.62 (d, 1 H,  $^4J = 2$  Hz, Ar-*H*), 3.00-2.80 (m, 12 H, SCH<sub>2</sub>), 2.20 (s, 3 H, 4-CH<sub>3</sub>), 2.19 (s, 3 H, 4-CH<sub>3</sub>), 2.16 (s, 3 H, 4-CH<sub>3</sub>), 2.14 (s, 3 H, 4-CH<sub>3</sub>), 2.08 (s, 3 H, 4-CH<sub>3</sub>), 1.97 (s, 3 H, 4-CH<sub>3</sub>), 1.36 [s, 9 H, 6-C(CH<sub>3</sub>)], 1.24 [s, 9 H, 6-C(CH<sub>3</sub>)], 1.17 [s, 18 H, 6-C(CH<sub>3</sub>)], 1.13 [s, 9 H, 6-C(CH<sub>3</sub>)], 1.05 [s, 9 H, 6-C(CH<sub>3</sub>)].

# Ring-Opening Polymerization of *rac*-Lactide

## Kinetic analysis

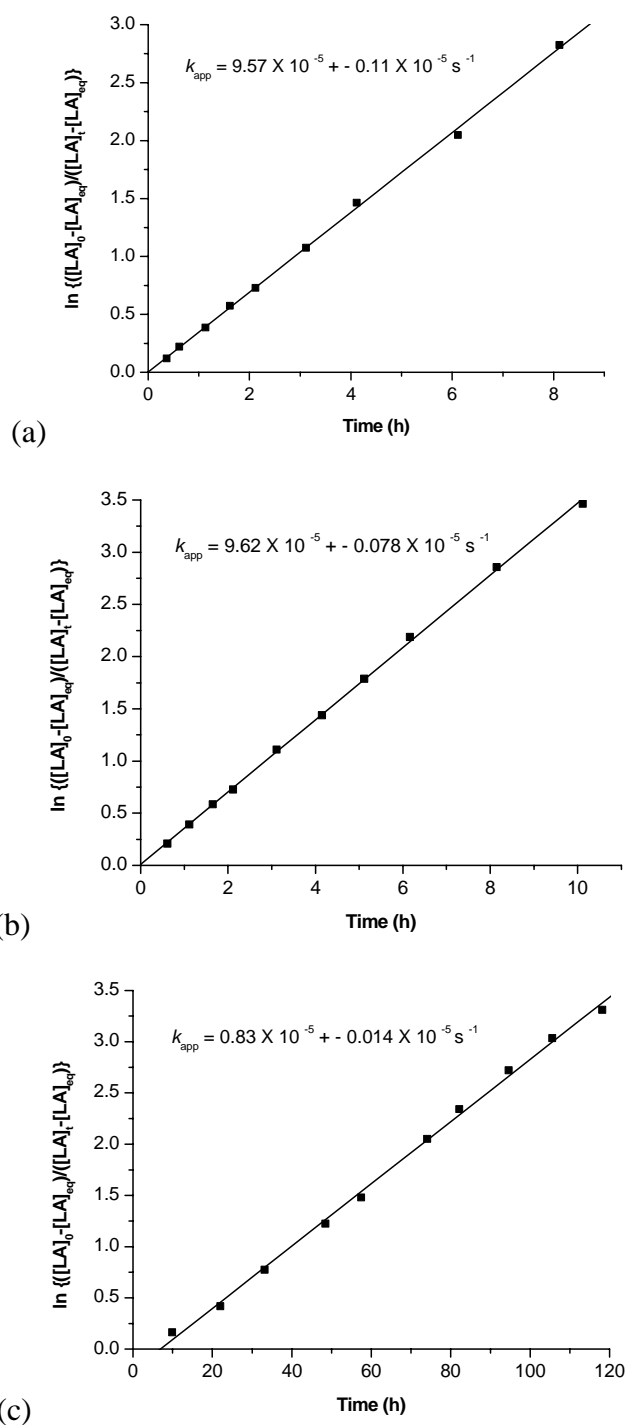

**Figure S1.** Semilogarithmic plots of *rac*-lactide conversion with time using (a) complex **1**/<sup>i</sup>PrOH; (b) complex **2**/<sup>i</sup>PrOH; (c) complex **3**/<sup>i</sup>PrOH in toluene at 70°C,  $[LA]_0: [Al]_0: [{}^iPrOH]_0 = 100:1:1$ ;  $[LA]_{eq} = 0.02 \text{ mol L}^{-1}$

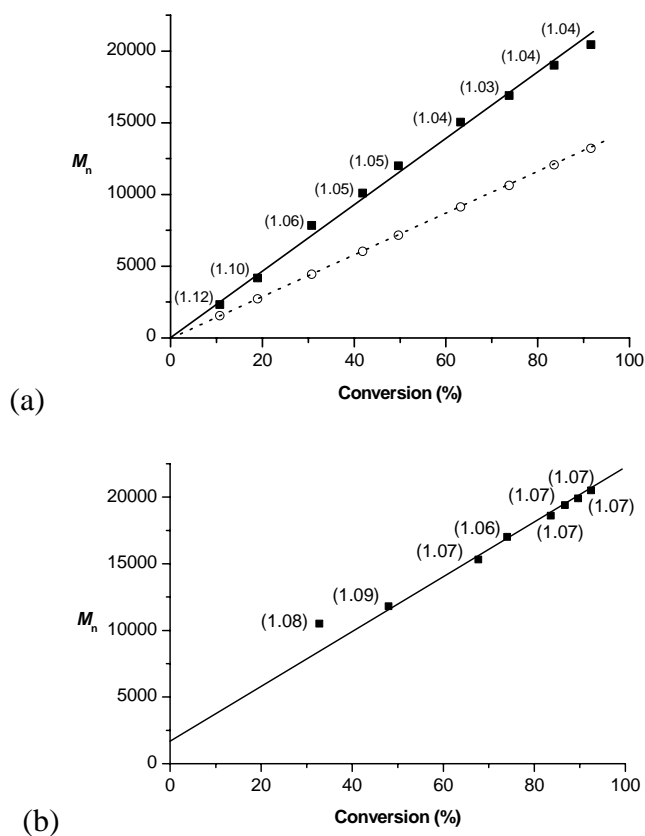

**Figure S2.** Plots of number molecular weight  $M_n$  of PLA versus monomer conversion using (a) complex **1** /  $i\text{PrOH}$ ; (b) complex **3** /  $i\text{PrOH}$  in toluene at  $70^\circ\text{C}$ ,  $[\text{LA}]_0 : [\text{Al}]_0 : [i\text{PrOH}]_0 = 100:1:1$ .

## Microstructure analysis of Poly lactides

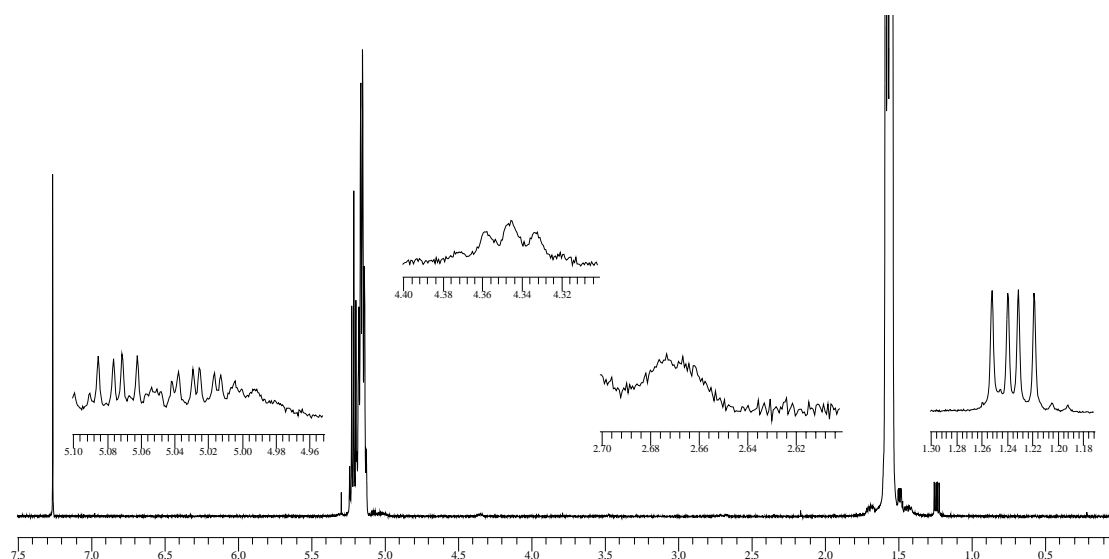

**Figure S3.**  $^1\text{H}$  NMR( $\text{CDCl}_3$ , 500 MHz) spectrum of poly(lactide) using complex **1** /  $^i\text{PrOH}$  in toluene at  $70^\circ\text{C}$ ,  $[\text{LA}]_0 : [\text{Al}]_0 : [^i\text{PrOH}]_0 = 100:1:1$ , 95% conversion.

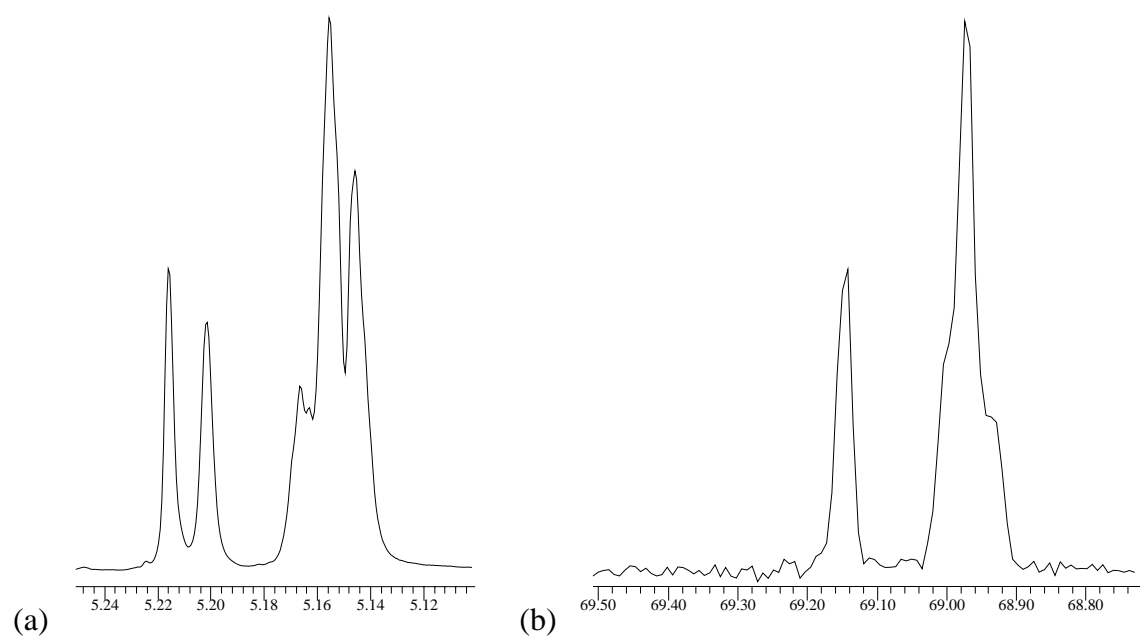

**Figure S4.** (a) Methine region in homonuclear decoupled  $^1\text{H}$  NMR; (b) Methine region in  $^{13}\text{C}$  NMR ( $\text{CDCl}_3$ , 500 MHz) of poly(lactide) using complex **1** /  $^i\text{PrOH}$  in toluene at  $70^\circ\text{C}$ ,  $[\text{LA}]_0 : [\text{Al}]_0 : [^i\text{PrOH}]_0 = 100:1:1$ , 95% conversion. Atactic polymer, no transesterification.

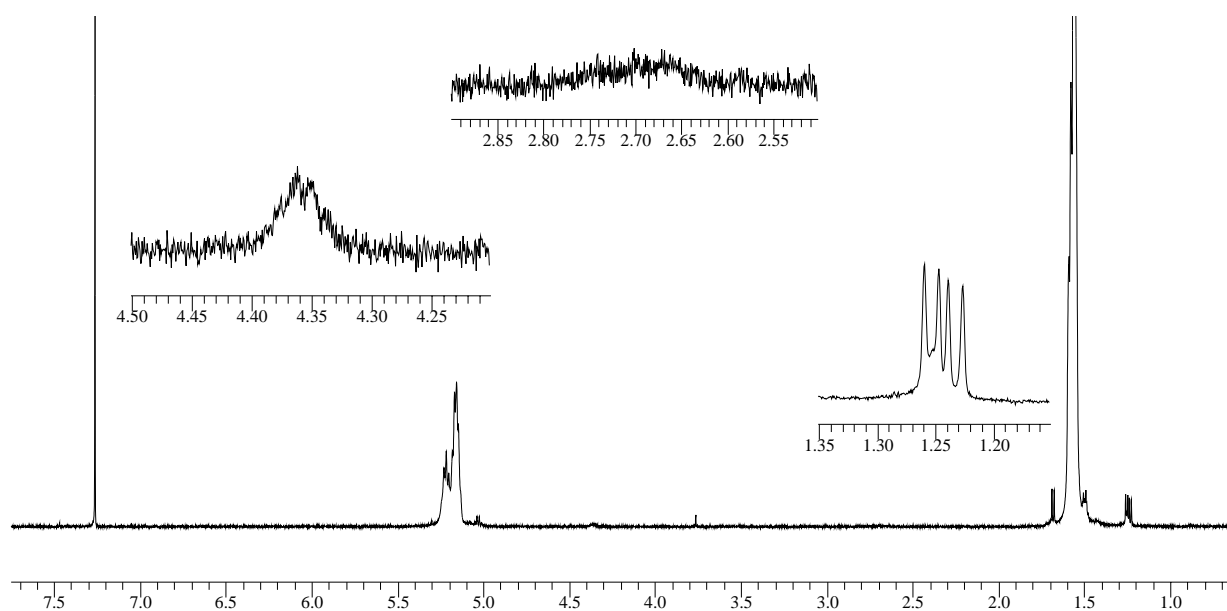

**Figure S5.**  $^1\text{H}$  NMR ( $\text{CDCl}_3$ , 500 MHz) spectrum of poly(lactide) using complex **3** /  $i\text{PrOH}$  in toluene at  $70^\circ\text{C}$ ,  $[\text{LA}]_0: [\text{Al}]_0: [i\text{PrOH}]_0 = 100:1:1$ , 33% conversion.

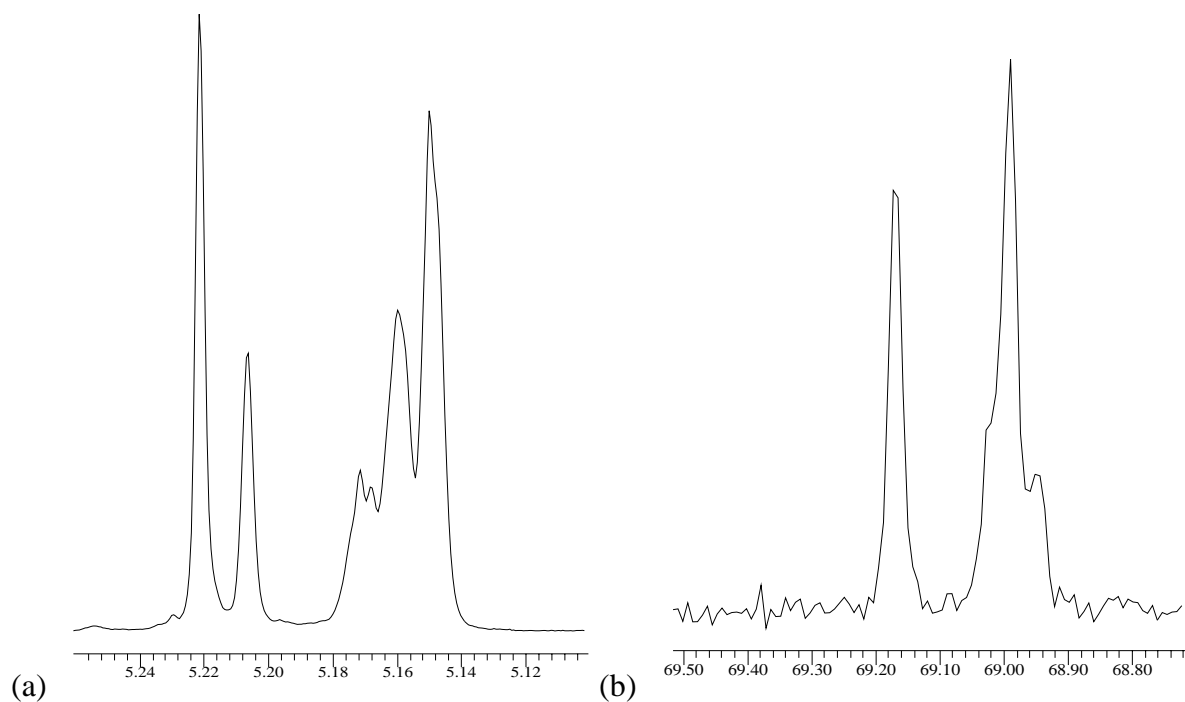

**Figure S6.** (a) Methine region in homonuclear decoupled  $^1\text{H}$  NMR; (b) Methine region in  $^{13}\text{C}$  NMR ( $\text{CDCl}_3$ , 500 MHz) of poly(lactide) using complex **3** /  $i\text{PrOH}$  in toluene at  $70^\circ\text{C}$ ,  $[\text{LA}]_0: [\text{Al}]_0: [i\text{PrOH}]_0 = 100:1:1$ , 93% conversion. Heterotactic-enriched polymer, no transesterification.
